# Supplementary material for: The Citizen Phage Library: Rapid Isolation of Phages for the Treatment of Antibiotic Resistant Infections in the UK
Source: MDPI journal article supplement (doi:10.3390/microorganisms12020253), 2024-01-25

**The Citizen Phage Library: rapid isolation of phages for the treatment of antibiotic resistant infections in the UK**

**Supplementary Material**

**Methods**

**Table S1.** Antibiotic susceptibility profiles for *K. pneumoniae*, *E. cloacae* and *E. coli* strains (susceptibility information provided by the clinical microbiology laboratory).

|                                          | Carba-5-IMP Test | Carba-5-KPC Test | Carba-5-NDM Test | Carba-5-OXA-48-Test | Carba-5-VIM Test | Cefiderocol | Ceftazidime-Avibactam | Ceftolozane-Tazobactam | Chloramphenicol | Ciprofloxacin | Co-Trimoxazole | Gentamicin | Amikacin |
|------------------------------------------|------------------|------------------|------------------|---------------------|------------------|-------------|-----------------------|------------------------|-----------------|---------------|----------------|------------|----------|
| <i>Klebsiella pneumoniae</i> (BPRG 1484) | Pos              | Neg              | Neg              | Neg                 | Neg              | S           | R                     | R                      | S               | R             | R              | S          | S        |
| <i>Enterobacter cloacae</i> (BPRG 1482)  | Pos              | Neg              | Neg              | Neg                 | Neg              | S           | R                     | R                      | S               | S             | R              | R          | S        |
| <i>Escherichia coli</i> (BPRG 1486)      | Pos              | Neg              | Neg              | Neg                 | Neg              | S           | R                     | R                      | S               | R             | R              | S          | S        |

**Axenic phage purification**

For axenic phage purification two methods were used. For the first approach, phage suspensions in SM buffer were serially diluted (1:10) in sterile PBS in a microtitre plate and 5 µL of each dilution was spotted onto inoculated top agar overlays. Following overnight incubation at 37 °C, a well isolated plaque was picked from the highest dilution yielding plaques. The core was placed in 100 µL of SM buffer and the process was repeated a further two times. At the end of three rounds of purification, the phage suspension in SM buffer was considered to be axenic. For the second approach, the phage suspension was serially diluted (1:10) in sterile PBS in a microtitre plate as before. Each dilution was then spotted (5 µL) onto inoculated top agar and incubated overnight at 37 °C. The dilution plate was stored at 4 °C. The highest dilution giving plaques (2-10 individual plaques within the 5 µL spot) was then noted. Using the original microtitre dilution plate, 50-100 µL of the selected dilution was added to 3 mL of molten top agar along with 1 mL of mid-logarithmic

culture and poured over the surface of a 9 cm diameter bottom agar plate. After overnight incubation, well isolated plaques were usually obtained with good clearance around each plaque. A single well isolated plaque was selected and transferred to SM buffer. At this point the phage was considered axenic.

#### *In vivo Galleria mellonella infection assay*

The efficacy of *K. pneumoniae* phage cocktails was assessed using an *in vivo* *G. mellonella* model described by Champion *et al.* (40). The bacterial inoculum was prepared as follows. A mid-logarithmic culture of *K. pneumoniae* BPRG 1484 grown in sLB was centrifuged at 5,000 × *g* for 10 min and the resulting pellet resuspended in sterile saline to give an OD<sub>600</sub> of 1 ± 0.05. Viable counts were carried out on the bacterial suspension according to the method of Miles and Misra (57). A *K. pneumoniae* suspension with an OD<sub>600</sub> = 1 was expected to contain approximately 5 × 10<sup>8</sup> CFU/mL. Phage seed lots were first checked for sterility by spotting a 5 µL drop of the preparation onto LB agar. Plates were checked for microbial growth following overnight incubation at 37 °C. PFU/mL counts were carried out to determine the titre of the phage seed lots as described previously. Dilutions of the phage seed lots were prepared in sterile saline as required. Research-grade *G. mellonella* larvae in their final-instar stage were obtained from the *Galleria mellonella* Research Centre (University of Exeter, UK). Larvae were stored in the dark at 15 °C and used within the week of arrival. Larvae were divided into treatment groups and any that were discoloured or appeared to be in poor health were discarded. A 250 µL Hamilton syringe (Merck, Darmstadt, Germany) was used for inoculations. The needle was prepared before and between treatments by washing twice in 70% ethanol and twice in 1× PBS. To check needle sterility before and after injections, PBS washes were spotted onto LB agar, placed at 37 °C and checked for microbial growth following overnight incubation. Separate needles were used for bacterial and phage inoculums. Larvae were injected with 10 µL of inoculum in the first left proleg. Where two injections were necessary, the second injection was delivered into the first right proleg after a 30 min rest period. Injected larvae were placed on filter paper in petri dishes and any larvae showing signs of injury or loss of haemolymph from the injection site were replaced. No-stab controls were observed alongside each experiment. Once injections were complete, the larvae were transferred to 3D printed plastic trays with wells to separate and contain individual larvae (Figure S1). Trays were covered with fitted lids and incubated at 37 °C.

**Table S2.** Treatment groups for the experiment to determine effect of phage cocktails on the melanisation of *K. pneumoniae* infected *G. mellonella* larvae (n = 10). Experiment carried out once only. The dose for the *K. pneumoniae* inoculum was  $4.0 \times 10^6$  CFU in saline delivered in a 10  $\mu$ L volume. The dose for the phage cocktails was  $2 \times 10^7$  PFU in saline delivered in a 10  $\mu$ L volume (with  $1 \times 10^7$  PFU for each phage in the two-phage cocktails and  $5 \times 10^6$  PFU for each phage in the four-phage cocktail). Larvae receiving no injections were kept in a separate petri-dish.

| Treatment group (n = 10) | Injection 1 (10 $\mu$ L)       | Injection 2 (10 $\mu$ L)                               |
|--------------------------|--------------------------------|--------------------------------------------------------|
| 1 (uninfected)           | saline                         | saline                                                 |
| 2 (uninfected)           | saline                         | cocktail 1 (CPL00362 and CPL00368)                     |
| 3 (uninfected)           | saline                         | cocktail 2 (CPL00369 and CPL00379)                     |
| 4 (uninfected)           | saline                         | cocktail 3 (CPL00362, CPL00368, CPL00369 and CPL00379) |
| 5 (infected)             | <i>K. pneumoniae</i> BPRG 1484 | saline                                                 |
| 6 (infected)             | <i>K. pneumoniae</i> BPRG 1484 | cocktail 1 (CPL00362 and CPL00368)                     |
| 7 (infected)             | <i>K. pneumoniae</i> BPRG 1484 | cocktail 2 (CPL00369 and CPL00379)                     |
| 8 (infected)             | <i>K. pneumoniae</i> BPRG 1484 | cocktail 3 (CPL00362, CPL00368, CPL00369 and CPL00379) |

**Table S3.** Plate layouts for the 8 treatment groups for the experiment to determine effect of phage cocktails on the survival and melanisation of *K. pneumoniae* BPRG 1484 infected *G. mellonella* larvae (n = 10).

**a) Plate 1 layout**

|   |   |   |   |   |   |
|---|---|---|---|---|---|
| J | 1 | 1 | 1 | 1 | 1 |
| I | 5 | 5 | 5 | 5 | 5 |
| H | 6 | 6 | 6 | 6 | 6 |
| G | 7 | 7 | 7 | 7 | 7 |
| F | 8 | 8 | 8 | 8 | 8 |
| E | 1 | 1 | 1 | 1 | 1 |
| D | 5 | 5 | 5 | 5 | 5 |
| C | 6 | 6 | 6 | 6 | 6 |
| B | 7 | 7 | 7 | 7 | 7 |
| A | 8 | 8 | 8 | 8 | 8 |

**b) Plate 2 layout**

|   |   |   |   |   |   |
|---|---|---|---|---|---|
| J |   |   |   |   |   |
| I | 3 | 3 | 3 | 3 | 3 |
| H | 4 | 4 | 4 | 4 | 4 |
| G | 5 | 5 | 5 | 5 | 5 |
| F |   |   |   |   |   |
| E |   |   |   |   |   |
| D | 3 | 3 | 3 | 3 | 3 |
| C | 4 | 4 | 4 | 4 | 4 |
| B | 5 | 5 | 5 | 5 | 5 |
| A |   |   |   |   |   |

**Commented [M1]:** Please merge subtables a,b into one table if possible.

**Commented [JF2R1]:** No, these tables represent 96 well plates and it would not make sense to merge them.

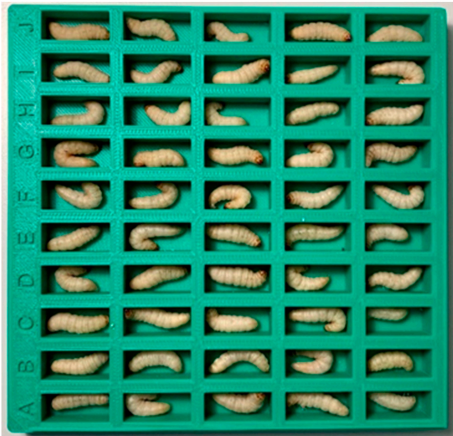

**Figure S1.** 3D printed plastic trays with wells to separate and contain individual *G. mellonella* larvae. Plastic lids were securely fitted to the tray to prevent escape during the assay.

## Results

**Table S4a** Characteristics of the 20 phages active against the *K. pneumoniae* BPRG 1484 strain and their citizen scientist given names.

| Phage    | Isolating host                 | Given name            | ● Novel species | ANI <sup>‡</sup> (%) | Closest known phage (accession number)  | Family            | Genus          | Genome length (bp) | Accession number |
|----------|--------------------------------|-----------------------|-----------------|----------------------|-----------------------------------------|-------------------|----------------|--------------------|------------------|
|          |                                |                       | ● Novel strain  |                      |                                         |                   |                |                    |                  |
| CPL00345 | <i>K. pneumoniae</i> DFI 20.19 | GlastoCabaret         | ●               | 91.7                 | Klebsiella phage vB_Kpn_B01 (MT380195)  | Demereciviridae   | Sugarlandvirus | 110,382            | OR896840         |
| CPL00361 | <i>K. pneumoniae</i> BPRG 1484 | Identical to CPL00362 |                 | 94.1                 | Klebsiella phage NL_ZS_3 (MT813142)     | Autographiviridae | Teetrevirus    | 38,263             | OR896841         |
| CPL00362 | <i>K. pneumoniae</i> BPRG 1484 | Bobalons              | ●               | 94.1                 | Klebsiella phage NL_ZS_3 (MT813142)     | Autographiviridae | Teetrevirus    | 38,265             | OR896842         |
| CPL00363 | <i>K. pneumoniae</i> BPRG 1484 |                       | ●               | 95.2                 | Klebsiella phage Sugarland (NC_042093)  | Demereciviridae   | Sugarlandvirus | 110,303*           | OR896843         |
| CPL00364 | <i>K. pneumoniae</i> BPRG 1484 | PoeticCupcake         | ●               | 94.7                 | Klebsiella phage KPP-5 (MW600722)       | Autographiviridae | Teetrevirus    | 38,959             | OR896844         |
| CPL00365 | <i>K. pneumoniae</i> BPRG 1484 | SmellyBerry           | ●               | 91.0                 | Klebsiella phage PhiKpNIH-10 (MN395285) | Drexlerviridae    | Webervirus     | 49,698             | OR896845         |
| CPL00366 | <i>K. pneumoniae</i> BPRG 1484 | RareGolfball          | ●               | 86.0                 | Klebsiella phage KOX1 (NC_047825)       | Drexlerviridae    | Webervirus     | 50,866*            | OR896846         |
| CPL00367 | <i>K. pneumoniae</i> BPRG 1484 | HelplessSquare        | ●               | 92.4                 | Klebsiella phage cp25 (OX335410)        | Drexlerviridae    | Webervirus     | 50,894             | OR896847         |
| CPL00368 | <i>K. pneumoniae</i> BPRG 1484 | DevonBitter           | ●               | 93.6                 | Klebsiella phage Sugarland (NC_042093)  | Demereciviridae   | Sugarlandvirus | 109,055*           | OR896848         |
| CPL00369 | <i>K. pneumoniae</i> BPRG 1484 |                       | ●               | 95.5                 | Klebsiella phage pK8 (OL702938)         | Drexlerviridae    | Webervirus     | 49,594*            | OR896849         |
| CPL00370 | <i>K. pneumoniae</i> BPRG 1484 | ViciousJeremy         | ●               | 94.5                 | Klebsiella phage KPP-5 (MW600722)       | Autographiviridae | Teetrevirus    | 38,798             | OR896850         |
| CPL00371 | <i>K. pneumoniae</i> BPRG 1484 | MegaDucksbill         | ●               | 93.7                 | Klebsiella phage KPP-5 (MW600722)       | Autographiviridae | Teetrevirus    | 38,471             | OR896851         |
| CPL00372 | <i>K. pneumoniae</i> BPRG 1484 | Bumbleweed            | ●               | 91.8                 | Klebsiella phage KPP-5 (MW600722)       | Autographiviridae | Teetrevirus    | 38,833             | OR896852         |
| CPL00373 | <i>K. pneumoniae</i> BPRG 1484 |                       | ●               | 96.6                 | Klebsiella phage mtp25 (OX335391)       | Drexlerviridae    | Webervirus     | 48,297*            | OR896853         |
| CPL00374 | <i>K. pneumoniae</i> BPRG 1484 | Keithsmous            | ●               | 91.1                 | Klebsiella phage KPP-5 (MW600722)       | Autographiviridae | Teetrevirus    | 39,057             | OR896854         |
| CPL00375 | <i>K. pneumoniae</i> BPRG 1484 | Keithstache           | ●               | 94.2                 | Klebsiella phage NL_ZS_3 (MT813142)     | Autographiviridae | Teetrevirus    | 39,044             | OR896855         |
| CPL00376 | <i>K. pneumoniae</i> BPRG 1484 | SlimeyKevin           | ●               | 90.3                 | Klebsiella phage KpKT21phi1 (MK278861)  | Drexlerviridae    | Webervirus     | 49,643*            | OR896856         |
| CPL00377 | <i>K. pneumoniae</i> BPRG 1484 | MagicalPorter         | ●               | 84.9                 | Klebsiella phage B1 (MW672037)          | Drexlerviridae    | Webervirus     | 49,849             | OR896857         |
| CPL00378 | <i>K. pneumoniae</i> BPRG 1484 | AloofButler           | ●               | 90.4                 | Klebsiella phage cp25 (OX335410)        | Drexlerviridae    | Webervirus     | 51,584             | OR896858         |
| CPL00379 | <i>K. pneumoniae</i> BPRG 1484 | StarXobjector         | ●               | 88.7                 | Klebsiella phage mtp25 (OX335391)       | Drexlerviridae    | Webervirus     | 49,862*            | OR896859         |

<sup>‡</sup> ANI – average nucleotide identity (%) to nearest neighbour, calculated using VIRIDIC

\*denotes original contig length as redundant termini were not found with apc

**Commented [M3]:** Please merge subtables a,b into one table if possible.

**Commented [JF4R3]:** No, these tables fit nicely onto one page each. I would prefer not to merge them.

**Table S4b.** Characteristics of the 21 phages active against the *E. coli* BPRG 1486 strain and their citizen scientist given names.

| Phage                               | Isolating host         | Given name            | Novel species | ANI* (%) | Closest known phage (accession number)        | Family                         | Genus                            | Genome length (bp) | Accession number |
|-------------------------------------|------------------------|-----------------------|---------------|----------|-----------------------------------------------|--------------------------------|----------------------------------|--------------------|------------------|
|                                     |                        |                       | Novel strain  |          |                                               |                                |                                  |                    |                  |
| CPL00121                            | <i>E. coli</i> BW25113 |                       | ●             | 95.2     | Escherichia phage tunus (NC_049816)           | <i>Drexlerviridae</i>          | <i>Warwickvirus</i>              | 51,258             | OR896819         |
| CPL00124                            | <i>E. coli</i> BW25113 | Stokescottia          | ●             | 91.2     | Salmonella phage L6jm (NC_048852)             | <i>Demerecviridae</i>          | <i>Tequintavirus</i>             | 109,873            | OR896820         |
| CPL00134L                           | <i>E. coli</i> BW25113 | Phagiculus            | ●             | 47.0     | Escherichia phage vB_EcoS_MM0 (MK373793)      | <i>Drexlerviridae</i>          | <i>Rogunavirinae</i> (subfamily) | 46,458             | OR896821         |
| CPL00136                            | <i>E. coli</i> BW25113 |                       | ●             | 96.5     | Salmonella phage vB_SenS-3 (MT004791)         | <i>Demerecviridae</i>          | <i>Epseptomavirus</i>            | 111,837            | OR896822         |
| CPL00144L                           | <i>E. coli</i> BW25113 | NorthRox              | ●             | 93.8     | Escherichia phage vB_Eco_Sip (OU734268)       | <i>Drexlerviridae</i>          | <i>Warwickvirus</i>              | 51,138             | OR896823         |
| CPL00146S                           | <i>E. coli</i> BW25113 | SmurfNell             | ●             | 91.0     | Escherichia phage SuperGirl (MZ501105)        | <i>Demerecviridae</i>          | <i>Epseptomavirus</i>            | 111,148            | OR896824         |
| CPL00151                            | <i>E. coli</i> BW25113 |                       | ●             | 96.8     | Escherichia phage W115 (ON286974)             | <i>Straboviridae</i>           | <i>Krischvirus</i>               | 164,032            | OR896825         |
| CPL00152                            | <i>E. coli</i> BW25113 | Aragogtheria          | ●             | 87.7     | Salmonella phage ende (MT074454)              | <i>Demerecviridae</i>          | <i>Epseptomavirus</i>            | 111,070*           | OR896826         |
| CPL00159                            | <i>E. coli</i> BW25113 | MikeNSara             | ●             | 94.5     | Escherichia phage atuna (MN850620)            | <i>Drexlerviridae</i>          | <i>Warwickvirus</i>              | 50,759             | OR896827         |
| CPL00160                            | <i>E. coli</i> BW25113 |                       | ●             | 97.0     | Escherichia phage tuinn                       | <i>Drexlerviridae</i>          | <i>Warwickvirus</i>              | 51,375             | OR896828         |
| CPL00168                            | <i>E. coli</i> BW25113 | MatMar                | ●             | 94.6     | Escherichia phage Jahat_MG145 (MK552105)      | <i>Drexlerviridae</i>          | <i>Warwickvirus</i>              | 50,761             | OR896829         |
| CPL00169<br>(contained<br>2 phages) | <i>E. coli</i> BW25113 | LinBro                | ●             | 91.6     | Escherichia phage momo (MN850580)             | <i>Ounavirinae</i> (subfamily) | <i>Felixounavirus</i>            | 85,930             | OR896830         |
|                                     |                        |                       | ●             | 97.5     | Escherichia phage tunus (NC_049816)           | <i>Drexlerviridae</i>          | <i>Warwickvirus</i>              | 50,979             | OR912983         |
| CPL00172                            | <i>E. coli</i> BW25113 | BubbaBully            | ●             | 76.5     | Enterobacter phage N5822 (MW032452)           | <i>Drexlerviridae</i>          | <i>Henuseptomavirus</i>          | 51,300             | OR896831         |
| CPL00187                            | <i>E. coli</i> BW25113 |                       | ●             | 96.5     | Escherichia phage W115 (ON286974)             | <i>Straboviridae</i>           | <i>Krischvirus</i>               | 163,470            | OR896832         |
| CPL00188L                           | <i>E. coli</i> BW25113 | WaterSpirit           | ●             | 92.5     | Escherichia phage Jahat_MG145 (MK552105)      | <i>Drexlerviridae</i>          | <i>Warwickvirus</i>              | 51,324             | OR896833         |
| CPL00220                            | <i>E. coli</i> BW25113 | Baret                 | ●             | 92.8     | Escherichia phage vB_Eco_mar004NP2 (LR027384) | <i>Demerecviridae</i>          | <i>Tequintavirus</i>             | 108,072            | OR896834         |
| CPL00221                            | <i>E. coli</i> BW25113 | RobRod40              | ●             | 69.3     | Escherichia phage AugustePiccard (MZ501051)   | <i>Drexlerviridae</i>          | <i>Christensenvirus</i>          | 47,574             | OR896835         |
| CPL00224                            | <i>E. coli</i> BW25113 | Identical to CPL00121 |               | 95.2     | Escherichia phage tunus (NC_049816)           | <i>Drexlerviridae</i>          | <i>Warwickvirus</i>              | 51,258             | OR896836         |
| CPL00229                            | <i>E. coli</i> BW25113 |                       | ●             | 95.0     | Escherichia phage vB_Eco_mar004NP2 (LR027384) | <i>Demerecviridae</i>          | <i>Tequintavirus</i>             | 98,746             | OR896837         |
| CPL00259L                           | <i>E. coli</i> BW25113 | McMelon               | ●             | 89.9     | Escherichia virus TH11 (MT446389)             |                                | <i>Dhillonvirus</i>              | 44,740             | OR896838         |
| CPL00262                            | <i>E. coli</i> BW25113 |                       | ●             | 95.1     | Salmonella phage S147                         | <i>Demerecviridae</i>          | <i>Epseptomavirus</i>            | 38,265             | OR896839         |

\* ANI – average nucleotide identity (%) to nearest neighbour, calculated using VIRIDIC

\*denotes original contig length as redundant termini were not found with apc

**Table S5.** Virulence Index ( $V_p$ ) for each of the phages against the target strains *K. pneumoniae* BPRG 1484 and *E. coli* BPRG 1486. The closer the  $V_p$  is to one, the greater the virulence of the phage. Phages selected for the preparation of seed lots are highlighted.

| Target strain                  | Phage    | Virulence Index ( $V_p$ ) |
|--------------------------------|----------|---------------------------|
| <i>K. pneumoniae</i> BPRG 1484 | CPL00345 | 0.100826                  |
| <i>K. pneumoniae</i> BPRG 1484 | CPL00361 | 0.689978                  |
| <i>K. pneumoniae</i> BPRG 1484 | CPL00362 | 0.817532                  |
| <i>K. pneumoniae</i> BPRG 1484 | CPL00363 | 0.982511                  |
| <i>K. pneumoniae</i> BPRG 1484 | CPL00364 | 0.723433                  |
| <i>K. pneumoniae</i> BPRG 1484 | CPL00365 | 0.590229                  |
| <i>K. pneumoniae</i> BPRG 1484 | CPL00366 | 0.306778                  |
| <i>K. pneumoniae</i> BPRG 1484 | CPL00367 | 0.323811                  |
| <i>K. pneumoniae</i> BPRG 1484 | CPL00368 | 1.004923                  |
| <i>K. pneumoniae</i> BPRG 1484 | CPL00369 | 0.992067                  |
| <i>K. pneumoniae</i> BPRG 1484 | CPL00370 | 0.721374                  |
| <i>K. pneumoniae</i> BPRG 1484 | CPL00371 | 0.736925                  |
| <i>K. pneumoniae</i> BPRG 1484 | CPL00372 | 0.668646                  |
| <i>K. pneumoniae</i> BPRG 1484 | CPL00373 | 0.634391                  |
| <i>K. pneumoniae</i> BPRG 1484 | CPL00374 | 0.662472                  |
| <i>K. pneumoniae</i> BPRG 1484 | CPL00375 | 0.79346                   |
| <i>K. pneumoniae</i> BPRG 1484 | CPL00376 | 0.863438                  |
| <i>K. pneumoniae</i> BPRG 1484 | CPL00377 | 0.248178                  |
| <i>K. pneumoniae</i> BPRG 1484 | CPL00378 | 0.257166                  |
| <i>K. pneumoniae</i> BPRG 1484 | CPL00379 | 0.912943                  |
| <i>K. pneumoniae</i> BPRG 1484 | No phage | 0                         |
|                                |          |                           |
|                                |          |                           |

| Target strain            | Phage     | Virulence Index ( $V_p$ ) |
|--------------------------|-----------|---------------------------|
| <i>E. coli</i> BPRG 1486 | CPL00121  | 0.891691                  |
| <i>E. coli</i> BPRG 1486 | CPL00124  | 0.222727                  |
| <i>E. coli</i> BPRG 1486 | CPL00134L | -0.069                    |
| <i>E. coli</i> BPRG 1486 | CPL00136  | 0.257928                  |
| <i>E. coli</i> BPRG 1486 | CPL00144L | 0.32647                   |
| <i>E. coli</i> BPRG 1486 | CPL00146S | 0.99137                   |
| <i>E. coli</i> BPRG 1486 | CPL00151  | 1.044243                  |
| <i>E. coli</i> BPRG 1486 | CPL00152  | 0.531361                  |
| <i>E. coli</i> BPRG 1486 | CPL00159  | 0.96467                   |
| <i>E. coli</i> BPRG 1486 | CPL00160  | 0.355708                  |
| <i>E. coli</i> BPRG 1486 | CPL00168  | 1.044042                  |
| <i>E. coli</i> BPRG 1486 | CPL00169L | 0.935219                  |
| <i>E. coli</i> BPRG 1486 | CPL00172  | 0.969007                  |
| <i>E. coli</i> BPRG 1486 | CPL00187  | 1.012859                  |
| <i>E. coli</i> BPRG 1486 | CPL00188L | 1.05294                   |
| <i>E. coli</i> BPRG 1486 | CPL00220  | 0.950268                  |
| <i>E. coli</i> BPRG 1486 | CPL00221  | -0.09499                  |
| <i>E. coli</i> BPRG 1486 | CPL00224  | 1.031495                  |
| <i>E. coli</i> BPRG 1486 | CPL00229  | 0.364842                  |
| <i>E. coli</i> BPRG 1486 | CPL00259L | 0.606492                  |
| <i>E. coli</i> BPRG 1486 | CPL00262  | 0.585566                  |
| <i>E. coli</i> BPRG 1486 | T7        | 1.009949                  |
| <i>E. coli</i> BPRG 1486 | No phage  | 0                         |

**Table S6.** Titre (PFU/mL) of phage lysates at each stage of the preparation of the four *K. pneumoniae* seed lots.

| Phage    | Mini phage lysate      | Midi phage lysate      | Maxi phage lysate      | Precipitated phage suspension (in 20 mL saline) | CsCl phage band before dialysis | Phage band after dialysis (final seed lots) |
|----------|------------------------|------------------------|------------------------|-------------------------------------------------|---------------------------------|---------------------------------------------|
| CPL00362 | 10 <sup>10</sup>       | 1.2 x 10 <sup>9</sup>  | TNTC                   | TNTC                                            | TNTC                            | 2.0 x 10 <sup>11</sup>                      |
| CPL00368 | 1.2 x 10 <sup>9</sup>  | 2.4 x 10 <sup>11</sup> | 5.0 x 10 <sup>12</sup> | 2.8 x 10 <sup>14</sup>                          | 3.8 x 10 <sup>16</sup>          | 2.0 x 10 <sup>10</sup>                      |
| CPL00369 | 2.6 x 10 <sup>10</sup> | 2.7 x 10 <sup>14</sup> | 2.5 x 10 <sup>9</sup>  | Not recorded                                    | 4.9 x 10 <sup>15</sup>          | 5.2 x 10 <sup>11</sup>                      |
| CPL00379 | 4.9 x 10 <sup>13</sup> | 1.2 x 10 <sup>8</sup>  | TNTC                   | 3.8 x 10 <sup>11</sup>                          | 4.3 x 10 <sup>17</sup>          | 4.0 x 10 <sup>11</sup>                      |

Too numerous to count (TNTC)

**Table S7.** Purity of the four *K. pneumoniae* phage seed lots as determined by short-read DNA sequencing.

| Phage    | Number of reads | Coverage of phage genome (x-fold) | % host reads | % unmapped reads | Evidence of prophage |
|----------|-----------------|-----------------------------------|--------------|------------------|----------------------|
| CPL00362 | 2,895,997       | 10,868                            | 1.13         | 0.14             | No                   |
| CPL00368 | 2,508,024       | 3,341                             | 0.12         | 0.18             | No                   |
| CPL00369 | 4,407,409       | 10,946                            | 15.92        | 0.16             | No                   |
| CPL00379 | 2,677,102       | 5,799                             | 25.3         | 0.61             | No                   |



#### *Galleria mellonella* infection assays

The first stage in the *G. mellonella* infection model experiments was to establish the dose of *K. pneumoniae* required to induce a measurable effect on melanisation and survival of the larvae so that any rescue effect of the phage cocktails could be observed and these results are presented in Figures S2 and S3. Challenging *G. mellonella* larvae with *K. pneumoniae* at the highest dose tested of  $4.6 \times 10^6$  CFU induced melanisation of the larvae and caused larval death. After 8 h, melanisation was significantly greater in larvae receiving the highest dose (Figure S2) and after 24 h, 60% of these larvae had died (Figure S3). No melanisation occurred in the larvae receiving PBS in place of *K. pneumoniae* and all larvae in this treatment group survived the duration of the experiment (24 h post-infection).

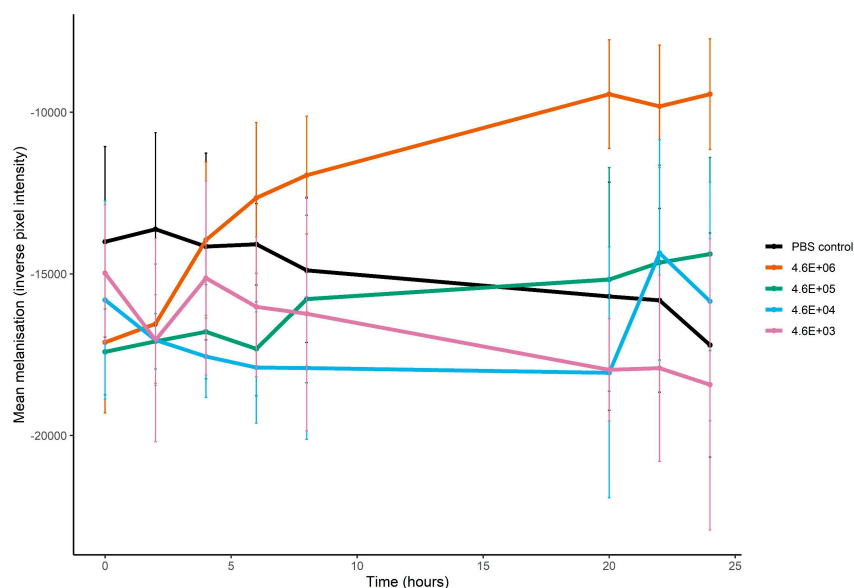

**Figure S2.** Effect of *K. pneumoniae* dose (CFU/mL) on melanisation of *G. mellonella* larvae. *K. pneumoniae* dose was administered in 10  $\mu$ L, control larvae received 10  $\mu$ L of sterile PBS.

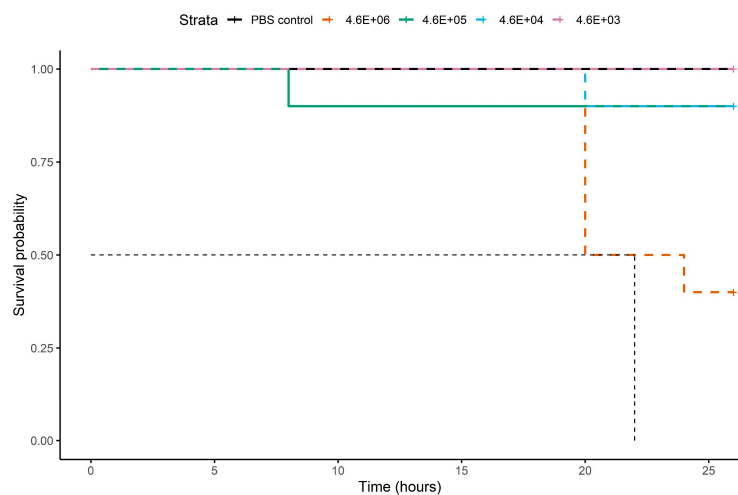

**Figure S3.** Effect of *K. pneumoniae* dose (CFU/mL) on survival of *G. mellonella* larvae. *K. pneumoniae* dose was administered in 10  $\mu$ L, control larvae received 10  $\mu$ L of sterile PBS.

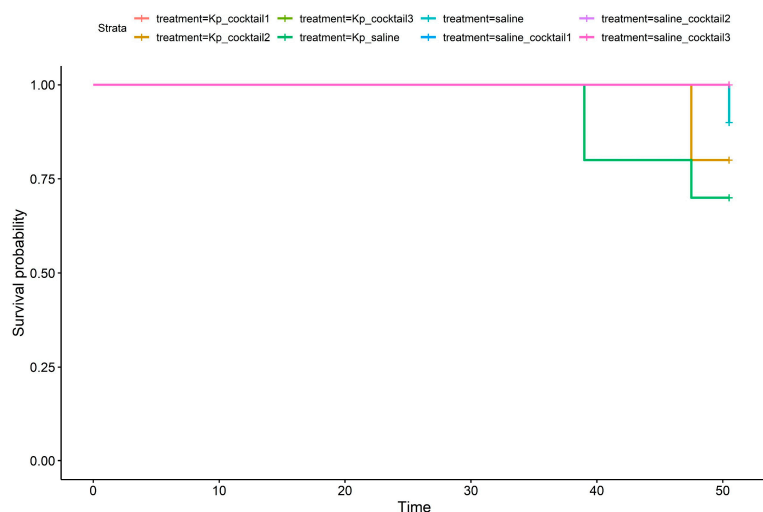

**Figure S4.** Effect of phage cocktails on survival of *K. pneumoniae* infected *G. mellonella* larvae. Each larvae received 2 injections: 10  $\mu$ L of *K. pneumoniae* bacterial cells or 10  $\mu$ L of saline and 10  $\mu$ L of phage cocktail or 10  $\mu$ L saline. *K. pneumoniae* dose =  $4.0 \times 10^6$  CFU delivered in a 10  $\mu$ L volume. Phage cocktail dose =  $2 \times 10^7$  PFU in saline delivered in a 10  $\mu$ L volume (with  $1 \times 10^7$  PFU for each phage in the two-phage cocktails and  $5 \times 10^6$  PFU for each phage in the four-phage cocktail).

**Table S8.** Full linear model showing the effect of treatment (saline, phage cocktail 1, phage cocktail 2, phage cocktail 3) and time on the melanisation of *K. pneumoniae* infected larvae (n = 10 per treatment group). *K. pneumoniae* infected larvae treated with saline was set as the reference group. Significance codes: 0 '\*\*\*' 0.001 '\*\*' 0.01 '\*' 0.05 '.'

| Variable                           | Estimate | Standard error | t value | p value   |
|------------------------------------|----------|----------------|---------|-----------|
| Intercept                          | -17121.2 | 1013.4         | -16.9   | <0.001*** |
| Infected larvae + saline           | 491.3    | 1433.1         | 0.34    | 0.73      |
| Infected larvae + cocktail 1       | 536.3    | 1433.1         | 0.37    | 0.70      |
| Infected larvae + cocktail 2       | 119.6    | 1433.1         | 0.08    | 0.93      |
| Infected larvae + cocktail 3       | 1382.9   | 1433.1         | 0.97    | 0.33      |
| Time 14hrs                         | 4571.1   | 1433.1         | 3.19    | 0.002**   |
| Time 17hrs                         | 4964.6   | 1433.1         | 3.46    | <0.001*** |
| Time 19hrs                         | 5548.5   | 1433.1         | 3.87    | <0.001*** |
| Time 21hrs                         | 5961.1   | 1433.1         | 4.16    | <0.001*** |
| Time 24hrs                         | 6744.6   | 1433.1         | 4.71    | <0.001*** |
| <b>Interactions treatment:time</b> |          |                |         |           |
| Infected larvae + saline:14hrs     | -6340.1  | 2026.7         | -3.13   | 0.002**   |
| Infected larvae + cocktail 1:14hrs | -1988.2  | 2026.7         | -0.98   | 0.33      |
| Infected larvae + cocktail 2:14hrs | -2075.6  | 2026.7         | -1.02   | 0.31      |
| Infected larvae + cocktail 3:14hrs | -4751.4  | 2026.7         | -2.34   | 0.02*     |
| Infected larvae + saline:17hrs     | -5.945.0 | 2026.7         | -2.93   | 0.004**   |
| Infected larvae + cocktail 1:17hrs | -2697.5  | 2026.7         | -1.33   | 0.18      |
| Infected larvae + cocktail 2:17hrs | -2409.0  | 2026.7         | -1.19   | 0.24      |
| Infected larvae + cocktail 3:17hrs | -2931.3  | 2026.7         | -1.45   | 0.15      |
| Infected larvae + saline:19hrs     | -7687.1  | 2026.7         | -3.80   | <0.001*** |
| Infected larvae + cocktail 1:19hrs | -2789.1  | 2026.7         | -1.38   | 0.17      |
| Infected larvae + cocktail 2:19hrs | -1765.4  | 2026.7         | -0.87   | 0.38      |
| Infected larvae + cocktail 3:19hrs | -4726.5  | 2026.7         | -2.33   | 0.02*     |
| Infected larvae + saline:21hrs     | -6031.6  | 2026.7         | -2.98   | 0.003**   |
| Infected larvae + cocktail 1:21hrs | -2342.5  | 2026.7         | -1.16   | 0.24      |
| Infected larvae + cocktail 2:21hrs | -2007.2  | 2026.7         | -0.99   | 0.32      |
| Infected larvae + cocktail 3:21hrs | -3814.9  | 2026.7         | -1.88   | 0.06      |
| Infected larvae + saline:24hrs     | -7368.7  | 2026.7         | -3.64   | <0.001*** |
| Infected larvae + cocktail 1:24hrs | -2829.4  | 2026.7         | -1.40   | 0.16      |
| Infected larvae + cocktail 2:24hrs | -3363.4  | 2026.7         | -1.66   | 0.09      |
| Infected larvae + cocktail 3:24hrs | -5563.6  | 2026.7         | -2.75   | 0.006**   |

Commented [M5]: Revised numeration, please confirm.

Commented [JF6R5]: Accepted, thank you.

(a) CPL00362

*K. pneumoniae* phage CPL00362

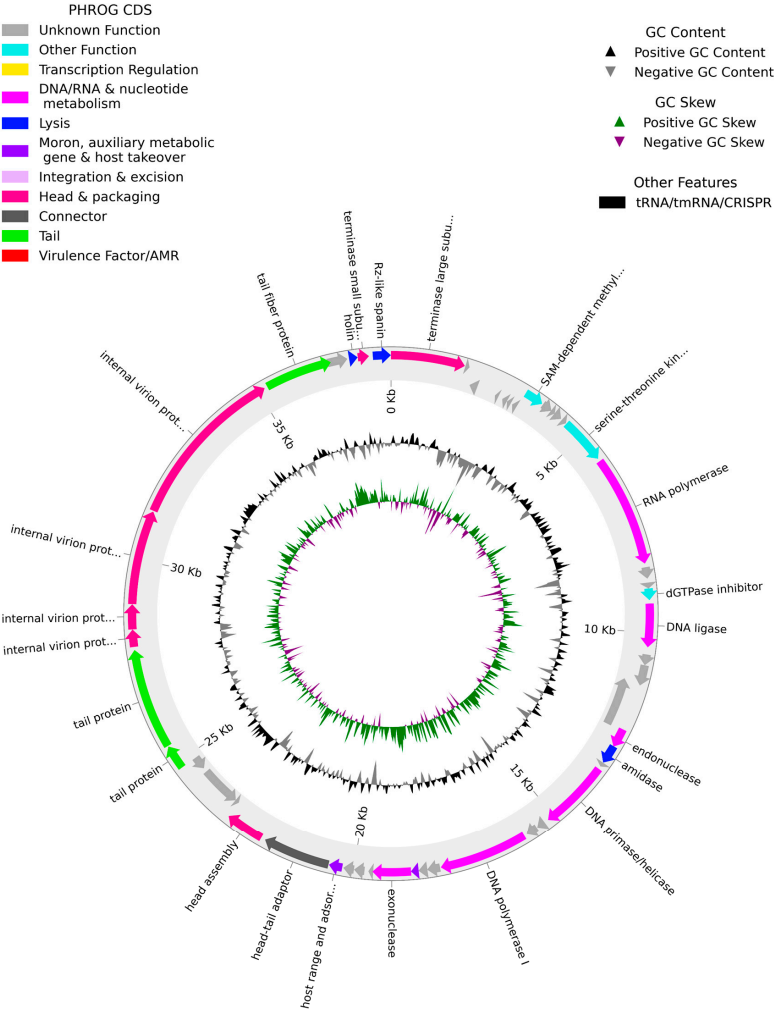

*K. pneumoniae* phage CPL00368

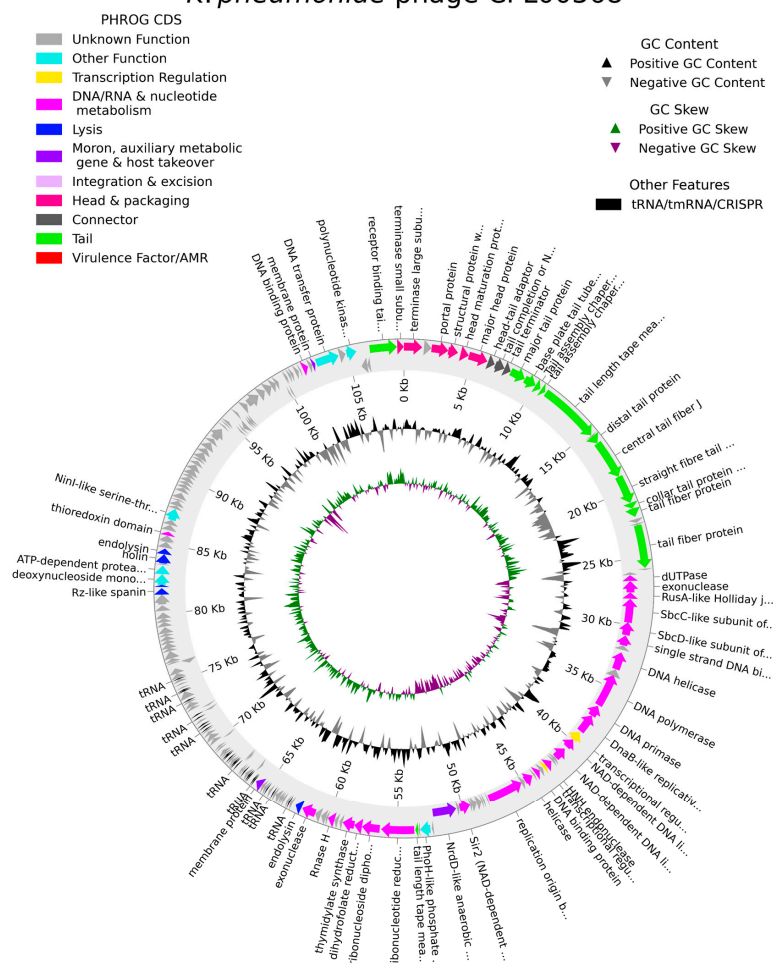

(c) CPL00369

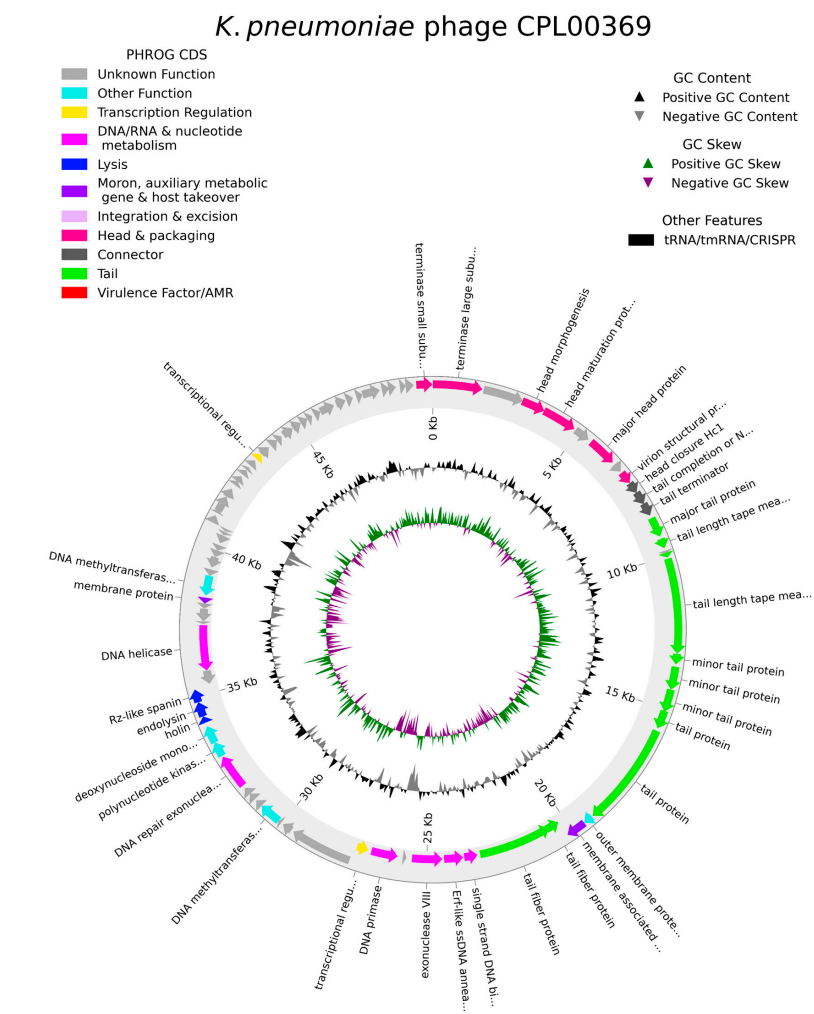

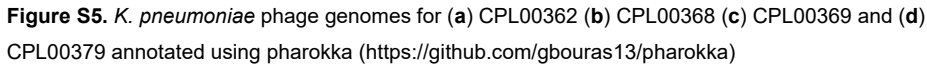

Supplement: s1 [file s1]
